# Supplementary material for: Development and Application of a Humanized Lung Fibrosis Organoid Model with Stromal and Macrophage Niches for Pharmaceutical Evaluation
Source: Research Square preprint supplement (doi:10.21203/rs.3.rs-8303567/v1), 2026-02-11
Supplement: Supplementary file 1 [file f4b6ec8ee9c81a000673375d.xlsx]

## Sheet: Sheet1
		Manuscript Title:	Development and Application of a Humanized Lung Fibrosis Organoid Model with Stromal and Macrophage Niches for Pharmaceutical Evaluation
		Corresponding Author:	Dr. Gao
		Target Journal:	Stem Cell Research & Therapy
		Instructions:	In the column “Location in Manuscript”, you must provide the specific section, page, and/or line numbers in your revised manuscript (e.g., Section 2.1, page 5). Use the “Author Notes” column for brief clarifications. For items that are genuinely not applicable, write “N/A” and state the reason briefly.
	Part 1: ARRIVE Essential 10
	Item No.	Checklist Item	Location in Manuscript	Author Notes
	1	Study design	N/A	N/A. This study did not involve an in vivo animal experiment with live animals.
	2	Sample size	N/A	N/A. This study did not involve an in vivo animal experiment. No live animals were assigned to experimental groups.
	3	Inclusion & exclusion criteria	N/A	N/A. This study did not involve longitudinal observation or intervention on live animals.
	4	Randomisation	N/A	N/A. This study did not involve allocation of live animals to experimental groups.
	5	Blinding	N/A	N/A. This study did not involve in vivo interventions or outcome assessments that would require blinding.
	6	Outcome measures	N/A	N/A. All outcome measures in this study were assessed in vitro using organoid cultures, not in live animals.
	7	Statistical methods	Method, Real-time quantitative PCR (qPCR)	The data are representative of three independent experiments which were compared by the t-test，two-tailed P value through Prism software. The error bars denote the mean ± SD. Normal distributions were tested by F-test.
	8	Experimental animals	Method, Animals	Male C57BL/6 mice aged 4–6 weeks were procured from Jennio Biotech Company (GuangZhou, China). A total of five mice were used in our study.
	9	Experimental procedures	Method, Mouse Lung organoids establish and culture	Lung tissues from male C57BL/6 mice (aged 4-6 weeks) after euthanasia with carbon dioxide were used exclusively for the generation of LOs. Upon receipt, the tissues were minced and subjected to enzymatic digestion within a solution comprising dispase II (Roche; #04942078001), DNase I (MilliporeSigma, #10104159001) and collagenase III (Gibco, #17101–015) at 37°C for 2 h. Post- digestion, the super…
	10	Results	N/A	N/A. Animal numbers refer to tissue donors, not experimental subjects in a live study.
	Part 2: Recommended Set
	Item No.	Checklist Item	Location in Manuscript	Author Notes
	11	Abstract	Abstract	The abstract describes the overall study using both mouse tissue-derived and human iPSC-derived organoid models. It mentions the use of mouse lung tissue for initial model establishment but does not describe live animal experiments, as none were conducted beyond tissue harvest.
	12	Background	N/A.	N/A. This study did not involve an in vivo animal experiment. The background and rationale for using lung tissue are provided in the Introduction (paragraphs 1-3), which focuses on the limitations of existing disease models.
	13	Objectives	Introduction, paragraphs 4	1. To faithfully reconstruct the multicellular interaction network driving PF in vitro; 2.To reproduce the progressive dynamics of fibrogenesis; 3. To establish a versatile platform for the simultaneous evaluation of drug efficacy and toxicity.
	14	Ethical statement	Ethics approval and consent to participate	All animal experiments conducted adhered to the Ethics Committee of Zhujiang Hospital of Southern Medical University (approval number: LAEC-2022-080, approval date: Jul 6, 2022, project name: Mechanisms of mesenchymal stem cells in acute lung injury) and were in in compliance with relevant guidelines of the Chinese government and regulations for the care and use of experimental animals.
	15	Housing and husbandry	N/A.	N/A. Animals were not housed for experimental procedures. Mice were euthanized for organoids harvest only. Basic animal source (e.g., strain, supplier) is stated in the Methods section.
	16	Animal care and monitoring	N/A.	N/A. Animals were not subjected to any experimental procedures, longitudinal care, or health monitoring. They were euthanized immediately for organoids harvest.
	17	Interpretation/scientific implications	Discussion, paragraphs 7	Our establishment of a scalable, fully humanized hiPSC-derived tri-culture platform inherently advances the “3Rs” principles. It provides a defined system to replace certain animal testing, particularly in drug screening. Its scalability allows for generating extensive human-relevant data from a single source, thereby reducing animal use in exploratory studies. Moreover, it enables the refined, p…
	18	Generalisability/translation	Discussion, paragraphs 2-4	This study did not involve direct translation of in vivo animal data to humans. The generalisability/translation discussed operates on two levels: (1) Technical translation: the methodology and proof-of-concept for fibrosis modeling and drug testing were first established using mouse lung tissue-derived organoids. (2) Core translation: the validated approach was then successfully applied to devel…
	19	Protocol registration	N/A.	N/A. The study protocol was not pre-registered in a publicly available database.
	20	Data access	N/A.	N/A. Data are available upon reasonable request.
	21	Funding and conflicts of interest	N/A.	N/A. There are no competing or financial interests.
